# Supplementary material
Source: PubMed Central journal article supplement (PMC3984052)

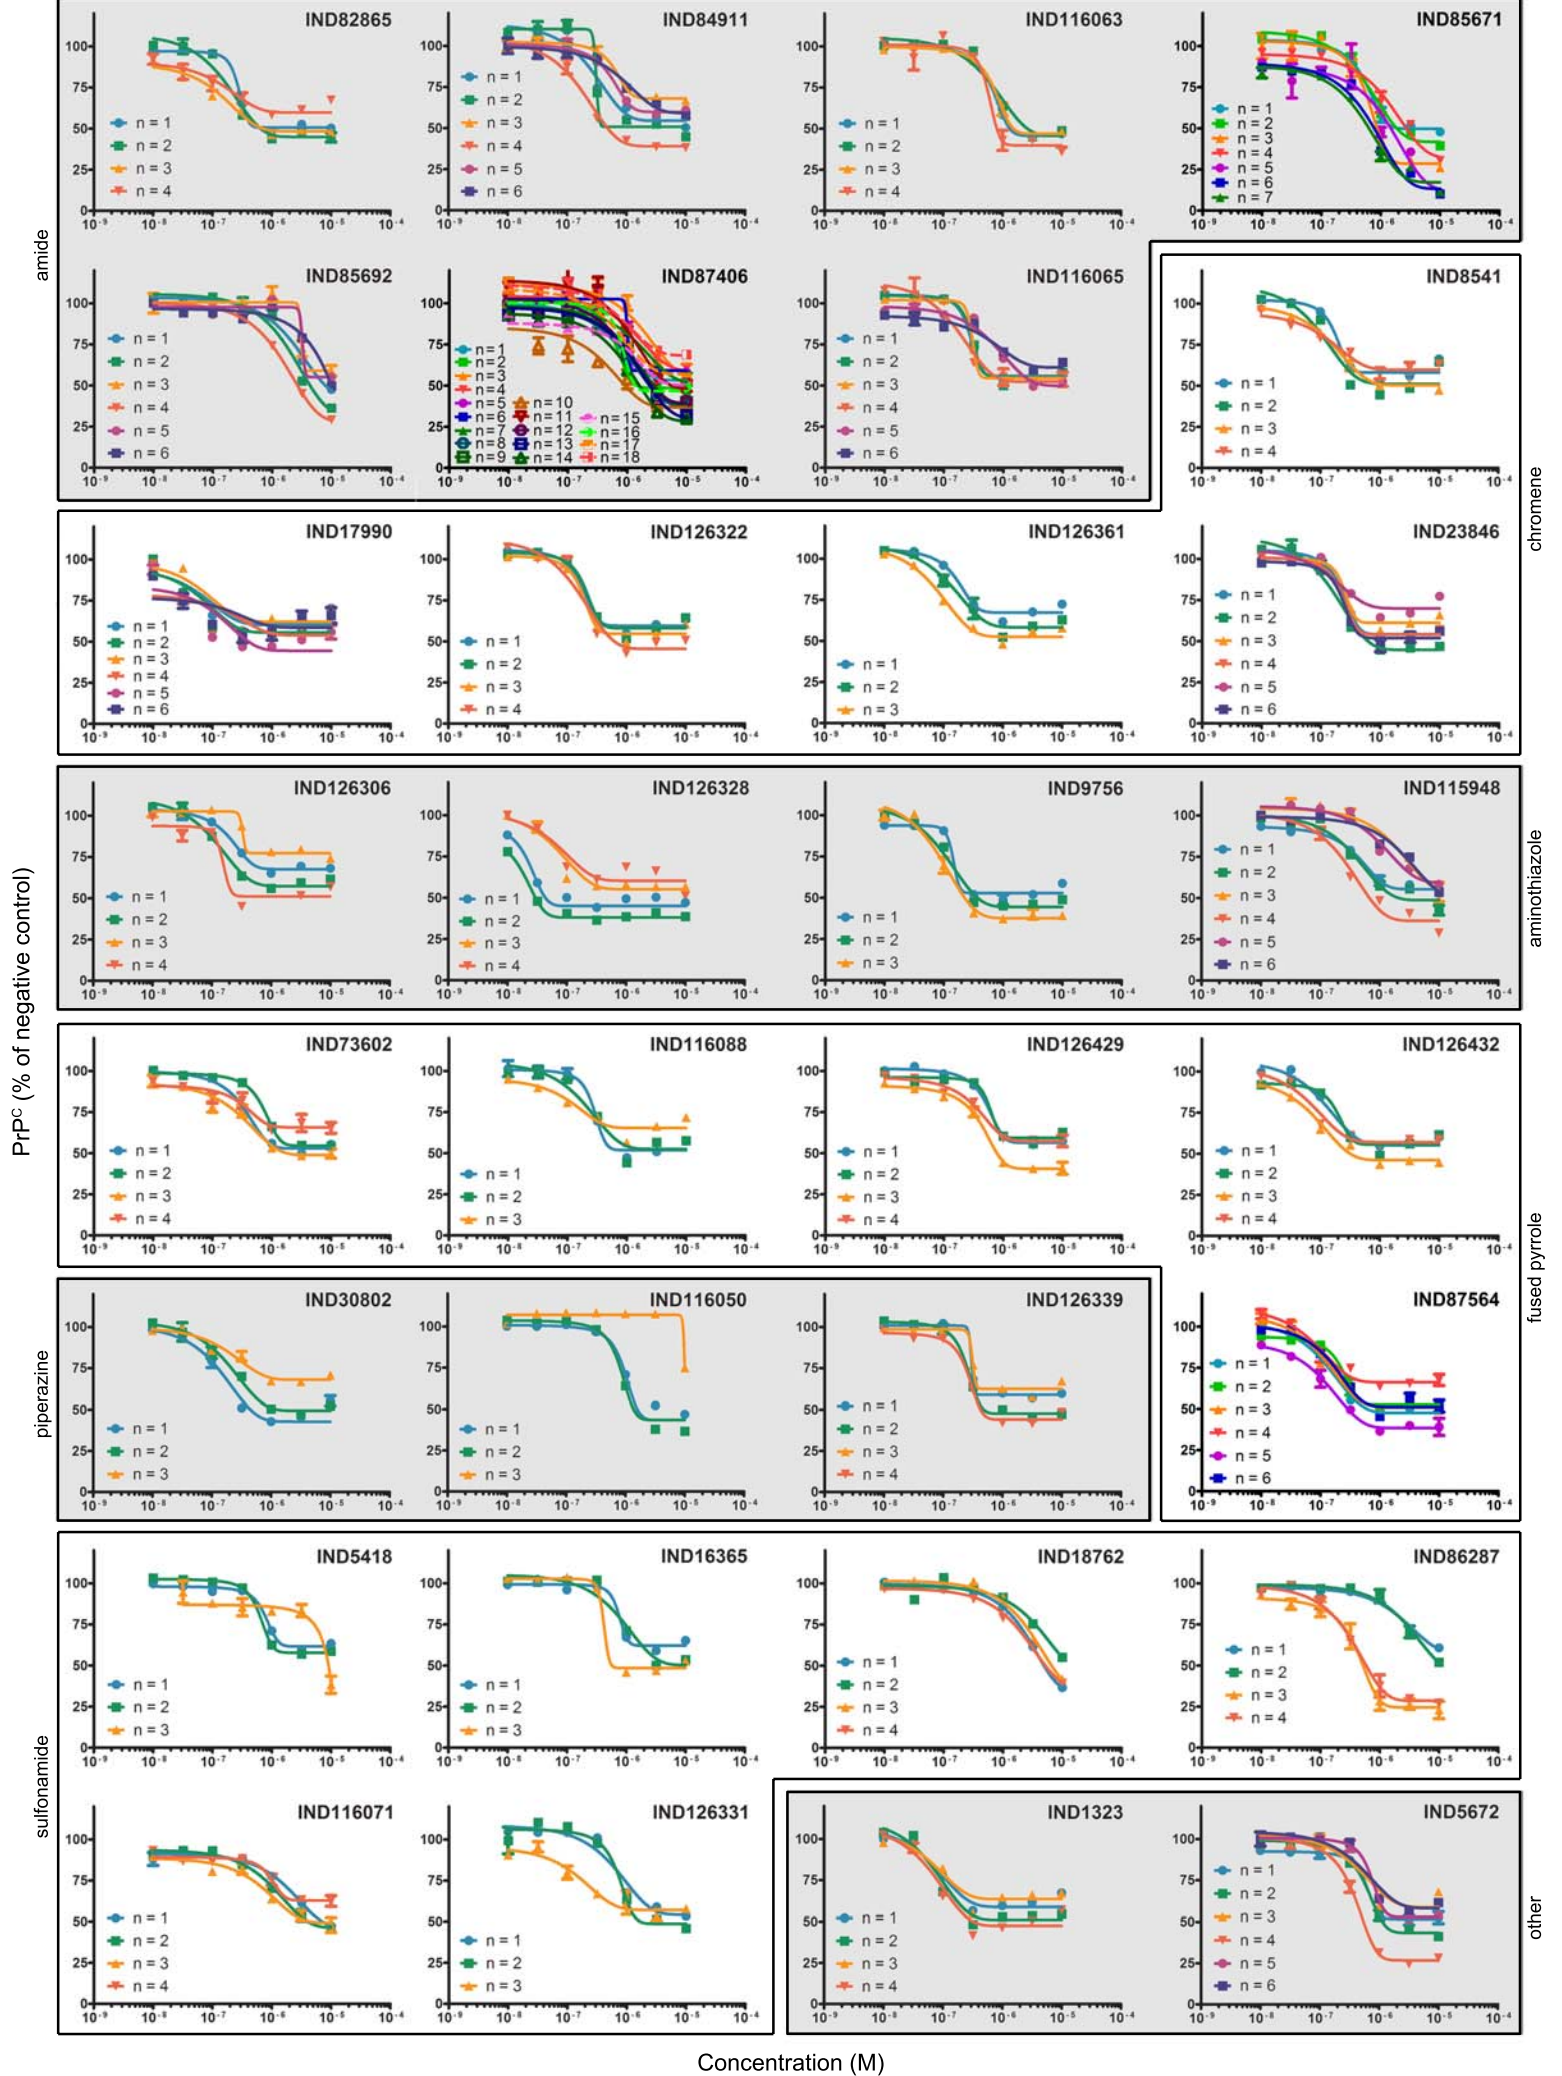

Concentration (M)

Supplement: NIHMS569516-supplement-01.pdf [file NIHMS569516-supplement-01.pdf]
